# Supplementary material for: Students’ Perception of Generative AI Use for Academic Purpose in UK Higher Education
Source: Preprints.org preprint supplement (doi:10.20944/preprints202405.1158.v1), 2024-05-17
Supplement: Supplementary file 1 [file supplementary]

**Supplemental Materials**

**Table S 1. Survey Questions**

| **The purpose of this study is to understand your perceptions and expectations of the use of GEN-AI and other AI tools (e.g., ChatGPT and Grammarly) in academia. The insight from this study will help shape the university's AI usage guidance and policy.** |
| --- |
|  |
| Section 1 |
| **General Information** |
| As the use of AI continues to permeate various aspects of our lives, there are overall mixed feelings about the advantages and implications, especially in academia. This survey aims to assess these feelings and expectations at the University of Bolton. Your response is totally confidential and will be used only for research to improve AI use in higher educations. |
| 1.Do you agree to participate in this study? |
| Yes |
| No |
|  |
| Section 2 |
| **Demographic Information** |
| 2.Gender. |
| Man |
| Woman |
| Non-binary |
| Prefer not to say |
| 3.Age Range. |
| 18-24 |
| 25-34 |
| 35-44 |
| 45-54 |
| 55-64 |
| 65 and over |
| 4.University level. |
| Undergraduate |
| Postgraduate |
| Doctoral |
| 5.Field of study. |
| Agriculture and Environmental Sciences |
| Arts and Design |
| Business and Management |
| Education |
| Engineering and Technology |
| Health and Medicine |
| Humanities and Social Sciences |
| Law |
| Natural Sciences |
| Physical Sciences |
| Section 3 |
| **Understanding of Artificial Intelligence** |
| 6.How familiar are you with Generative Artificial Intelligence (GEN-AI)? |
| Extremely familiar |
| Moderately familiar |
| Somewhat familiar |
| Slightly familiar |
| Not at all familiar |
| 7.How aware are you of GEN-AI use for academic purpose? |
| Extremely aware |
| Moderately aware |
| Somewhat aware |
| Slightly aware |
| Not at all aware |
| 8.Have you used any GEN-AI such as ChatGPT or other AI tools such as Grammarly for academic purposes during your time at university? |
| Yes |
| No |
| 9.Please specify the types of academic tasks for which you use GEN-AI and other AI tools? |
| Idea generation |
| Text generation |
| Paraphrasing and summarising |
| Grammar corrections |
| Data analysis and interpretation |
| Literature search |
| Question and answer |
| Language translation |
| 10.How frequently do you use GEN-AI and other AI tools for your academic tasks? |
| Always |
| Often |
| Sometimes |
| Rarely |
| Never |
| Section 4 |
| **Impact of GEN-AI and AI** |
| 11.How has GEN-AI or other AI tools impacted your academic performance? |
| Significantly improved |
| improved |
| No significant impact |
| Hindered |
| Significantly hindered |
| 12.GEN-AI and other AI tools provide academic advantage. |
| Strongly agree |
| Agree |
| Neutral |
| Disagree |
| Strongly disagree |
| Section 5 |
| **Perception of AI Use** |
| 13.What is your overall perception about the use of GEN-AI and other AI tools. |
| Positive |
| Neutral |
| Negative |
| 14.What challenges have you encountered while using AI tools in your academic work? |
| Finance (Subscription fee) |
| Lack of clarity from the university |
| Plagiarism concern |
| Data privacy issues |
| Bias in algorithms |
| Section 6 |
| **Expectations and Prospects** |
| 15.The use of GEN-AI and other AI tools for academic purposes will significantly increase in the future. |
| Strongly agree |
| Agree |
| Neutral |
| Disagree |
| Strongly disagree |
| 16.GEN-AI or other AI tools should be integrated into the university's curriculum. |
| Strongly agree |
| Agree |
| Neutral |
| Disagree |
| Strongly disagree |
| Section 7 |
| **General Feedback** |
| 17.Is there anything else you would like to share regarding your experience with AI tools in academia? |
| Enter your answer |
| 18.Describe AI use in one word. |
| Enter your answer |


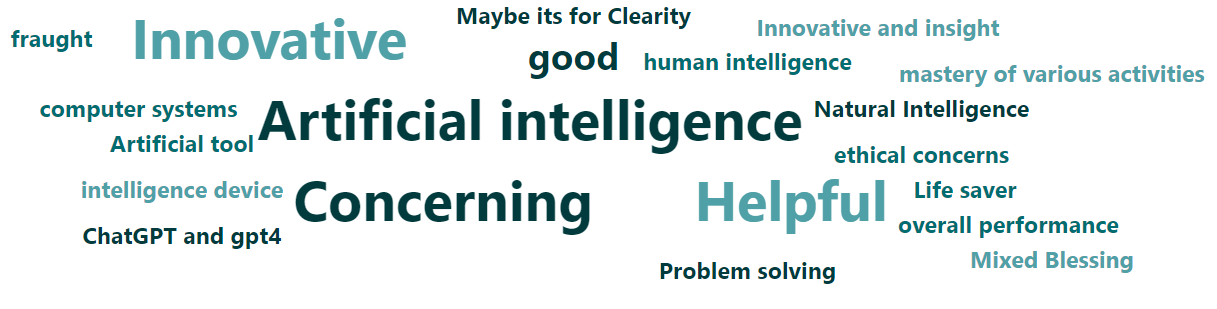


**Figure S 1.** Word cloud of respondents when asked to describe AI in one word..
